# Supplementary material for: Large-scale ocean connectivity and planktonic body size
Source: Nat Commun. 2018 Jan 10;9:142. doi: 10.1038/s41467-017-02535-8 (PMC5762663; doi:10.1038/s41467-017-02535-8)
Supplement: Supplementary file 1 — Supplementary Information [file 41467_2017_2535_MOESM1_ESM.pdf]

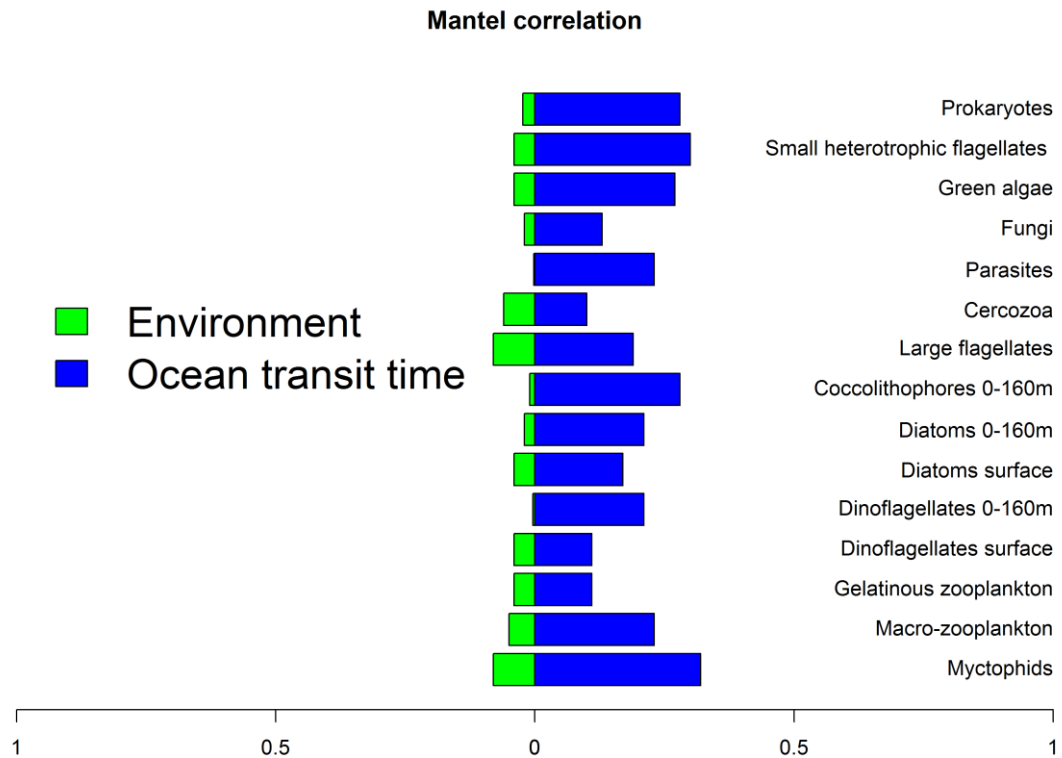

**Supplementary Figure 1. Correlations between community similarity with surface ocean transit time and environment.** Mantel R correlation showing the relative contribution of ocean transit time and environment shaping the community structure for the different biological groups. The Mantel tests is based on Pearson's product moment correlation using 9999 permutations. Blue: surface ocean transit time; Green: environmental distance.

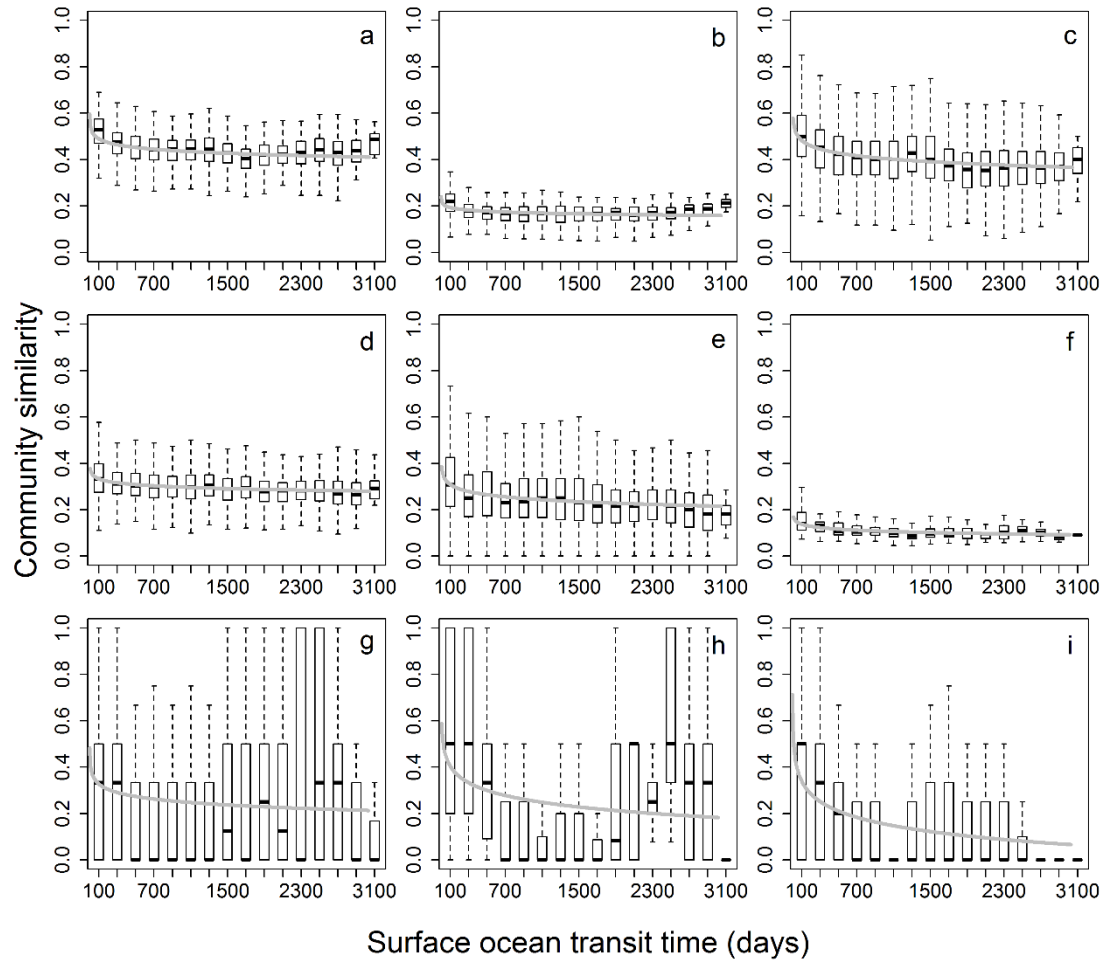

**Supplementary Figure 2. Time-decay between community similarity and surface ocean transit time.** Box-plots of community similarity and surface ocean transit time (bins of 200 days) for the different biological groups. The bottom and top of the box are the lower (Q1) and upper (Q3) quartiles and the band inside the box is the median. The whiskers extend up to 1.5 times the interquartile range (Q3-Q1) from the box. The points outside the whiskers are not drawn. The relationship is best approximated by a logarithmic model (grey line). (a) Prokaryotes, (b) Microbial eukaryotes all, (c) Coccolithophores 0-160m, (d) Dinoflagellates 0-160m, (e) Diatoms 0-160m, (f) Mesozooplankton 0-200m, (g) Gelatinous zooplankton, (h) Macro-zooplankton and (i) Myctophids.

a

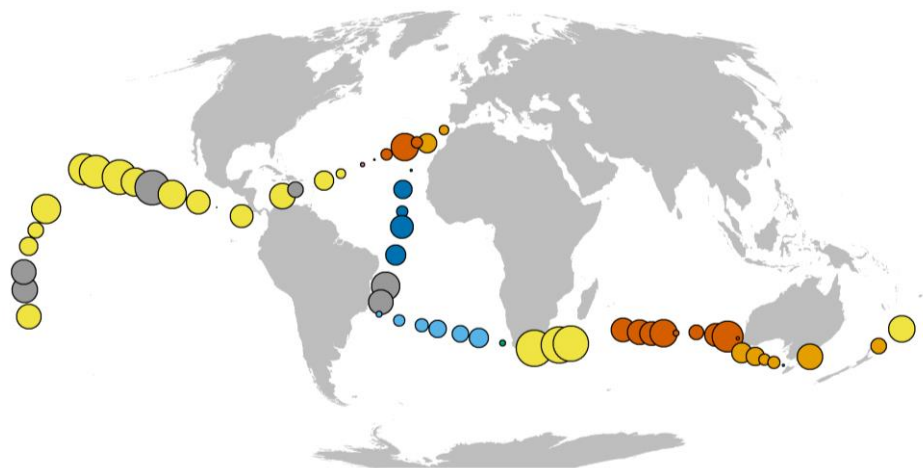

b

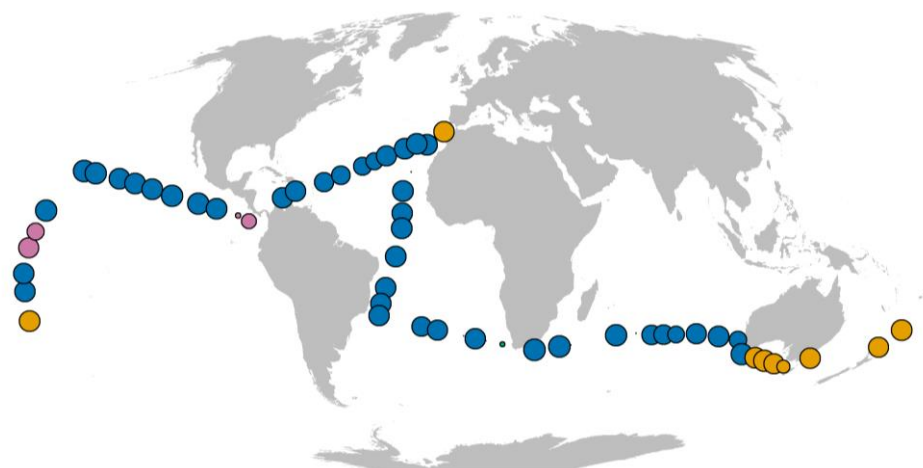

c

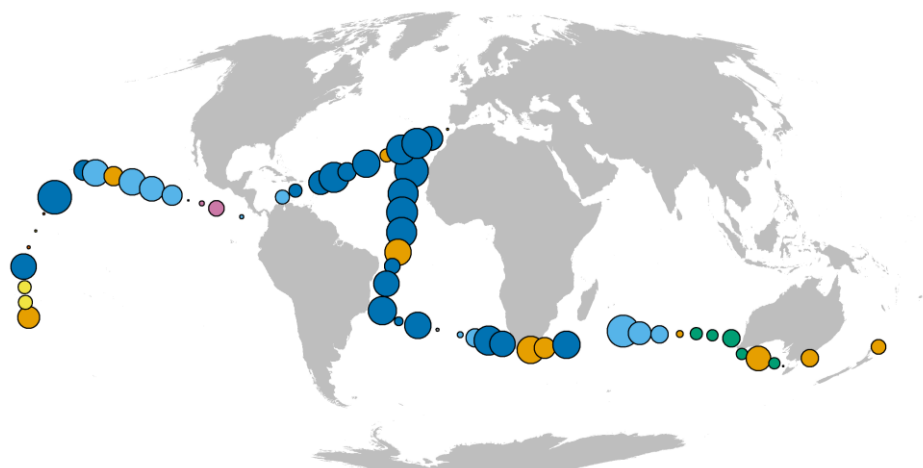

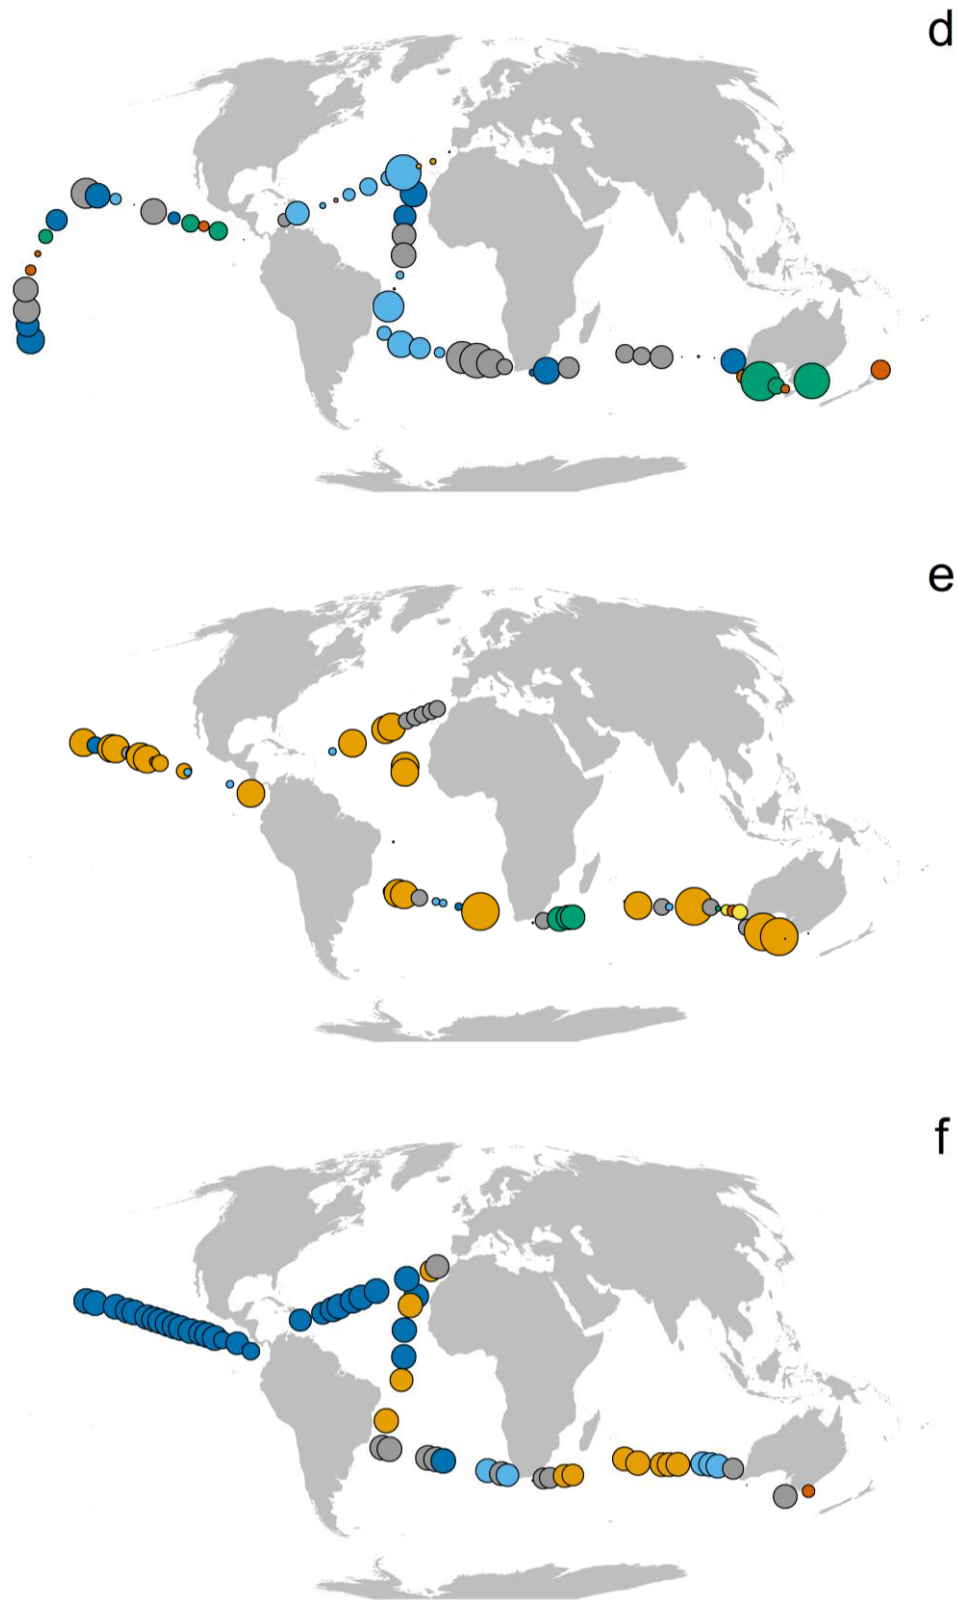

**Supplementary Figure 3. Spatial community patterns.** Hierarchical clustering based on the Jaccard similarity index for (a) Prokaryotes, (b) Microbial eukaryotes all, (c) Coccolithophores 0-160 m, (d) Dinoflagellates 0-160 m, (e) Gelatinous zooplankton and (f) Macro-zooplankton. Each color represents a different hierarchical cluster. The size of the stations indicates the number of connections (i.e. species or OTUs similarity between sites), that is, larger sized circles share more species (or OTUs) within all stations, compared to small sized circles. Some stations have been aggregated based on proximity for clarity.

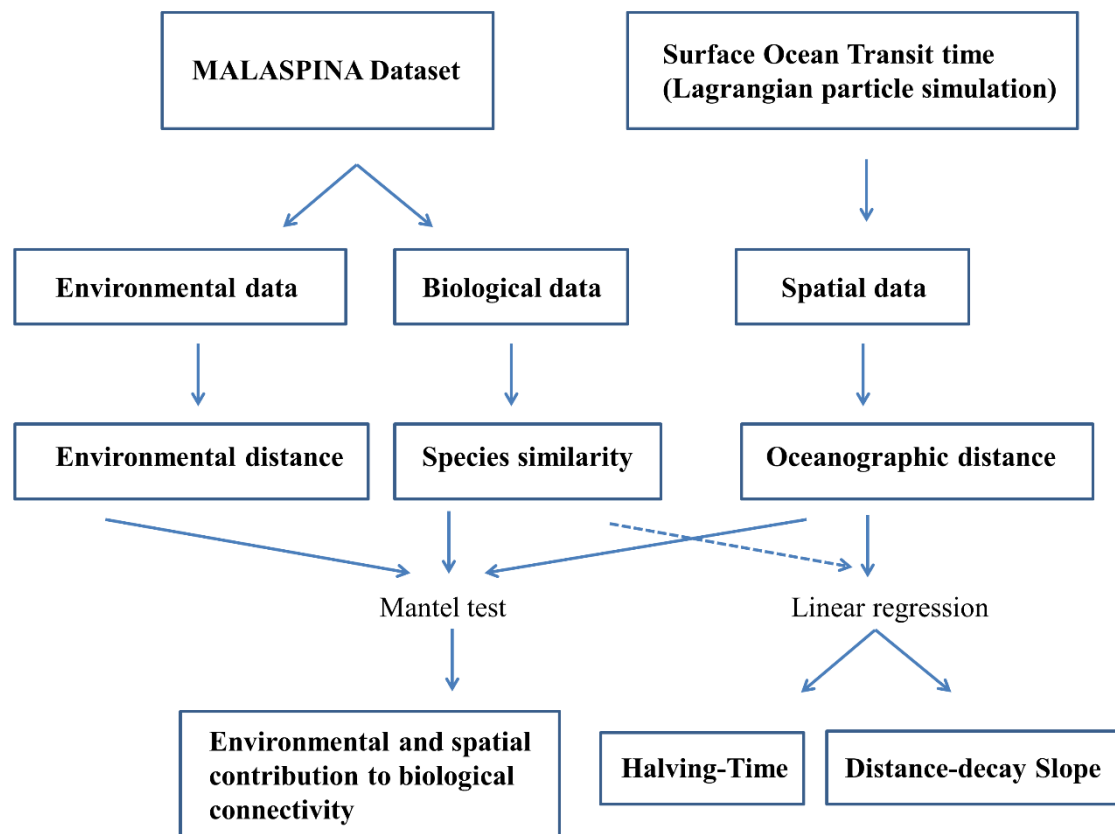

**Supplementary Figure 4. Flow diagram of the used methodology.** Main diagram of the methodology used to estimate the biological connectivity, in terms of dispersal scales (halving-time) and species spatial turnover (distance-decay).

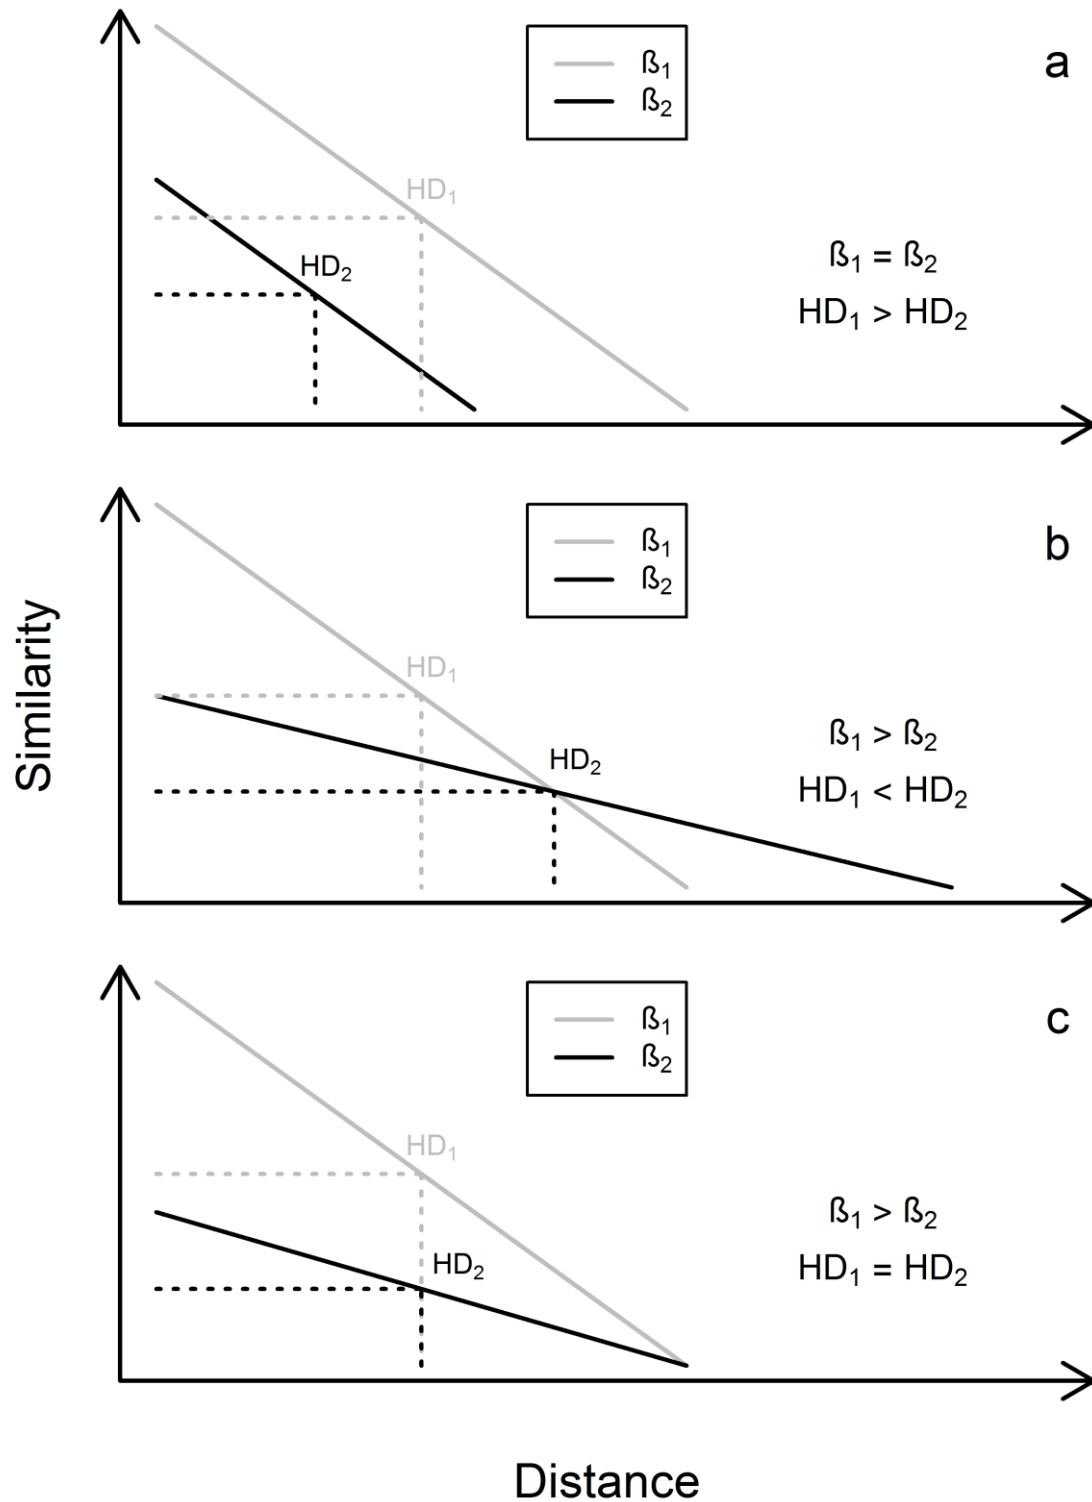

**Supplementary Figure 5. Similarity decay with distance in three different cases.** Conceptual figure denoting the similarity decay with distance in three different cases: (a) two equal distance-decay slopes ( $\beta_1 = \beta_2$ ) but different halving-distance ( $HD_1 > HD_2$ ), (b) two different distance-decay slopes ( $\beta_1 \neq \beta_2$ ) but different halving-distance ( $HD_1 > HD_2$ ) and (c) two different distance-decay slopes ( $\beta_1 \neq \beta_2$ ) but equal halving-distance ( $HD_1 = HD_2$ ).

**Supplementary Table 1. Correlation between environment and currents.** Mantel correlation between environmental distance and ocean transit times considering all-pairs of sampling sites. The statistical significance of the comparison is assessed using Mantel tests based on Pearson’s product moment correlation using 9999 permutations.

| Factors                                              | Number of pairs | Mantel R correlation | p-value |
|------------------------------------------------------|-----------------|----------------------|---------|
| Surface ocean transit time vs environmental distance | 133             | 0.09                 | 0.001   |

**Supplementary Table 2. Correlation between body size and environment.** Evaluation of the log-log relationship between the logarithms of environmental distance and group size, showing parametric models (all observations included) and non-parametric bootstrap cross-validations (95% confidence interval). Ln: Napierian logarithm.

| All biological groups                       | Statistic           | Parametric model      | Bootstrap       |
|---------------------------------------------|---------------------|-----------------------|-----------------|
| Ln (environmental distance)<br>vs Ln (Size) | Confidence interval |                       | (-0.054, 0.683) |
|                                             | p-value             | 0.27                  | >0.05           |
|                                             | RMSE                | 1.05                  |                 |
|                                             | Adjusted $r^2$      | 0.019                 |                 |
|                                             | Equation            | $y = -3.322 + 0.097x$ |                 |

**Supplementary Table 3. Description of the biological groups and identification and quantification methods for abundance.** Groups analyzed in the Malaspina survey, with its description, identification techniques and the methods used for global abundance estimation.

| Main biological group size range (mm)   | All biological groups           | Group description                                                                                                                                                                                          | Taxonomical or OTU identification                            | Methods used for abundance estimation |
|-----------------------------------------|---------------------------------|------------------------------------------------------------------------------------------------------------------------------------------------------------------------------------------------------------|--------------------------------------------------------------|---------------------------------------|
| Prokaryotes (0.0003 - 0.001)            | Prokaryotes                     | Archaea and Bacteria                                                                                                                                                                                       | HTS (High Throughput Sequencing) 16SrRNA                     | Flow cytometer counting               |
| Microbial eukaryotes all (0.0008-0.003) | Microbial eukaryotes all        | All picoeukaryotes (cells 0.0008-0.003 mm), including small heterotrophic flagellates, green algae, fungi, parasites, cercozoa, large flagellates, diatoms and dinoflagellates, and other minor components | HTS 18SrRNA                                                  | Microscope epifluorescence counting   |
| Microbial eukaryotes sub-groups         | Small heterotrophic flagellates | Small heterotrophic flagellates (MAST lineages – Marine Stramenopiles)                                                                                                                                     | HTS 18SrRNA                                                  | Not determined                        |
|                                         | Green algae                     | Green algae (Mamiellophyceae and Prasinophyceae)                                                                                                                                                           | HTS 18SrRNA                                                  | Not determined                        |
|                                         | Fungi                           | Fungi (Ascomycota, Basidiomycota and basal lineages)                                                                                                                                                       | HTS 18SrRNA                                                  | Not determined                        |
|                                         | Parasites                       | Parasites (MALV lineages – marine Alveolates)                                                                                                                                                              | HTS 18SrRNA                                                  | Not determined                        |
|                                         | Cercozoa                        | Cercozoa (all Cercozoa excluding the chlorarachniophytes)                                                                                                                                                  | HTS 18SrRNA                                                  | Not determined                        |
|                                         | Large flagellates               | Large flagellates (Katablepharidae, Picozoa and Telonema)                                                                                                                                                  | HTS 18SrRNA                                                  | Not determined                        |
|                                         | Dinoflagellates surface         | Dinoflagellates at surface                                                                                                                                                                                 | HTS 18SrRNA                                                  | Not determined                        |
|                                         | Diatoms surface                 | Diatoms at surface                                                                                                                                                                                         | HTS 18SrRNA                                                  | Not determined                        |
| Coccolithophores 0-160m (0.002-0.5)     | Coccolithophores 0-160m         | Coccolithophores, depth-integrated abundance.                                                                                                                                                              | Traditional taxonomy, Inverted microscopy-visual examination | Inverted microscopy counting          |
| Dinoflagellates 0-160m (0.002-0.5)      | Dinoflagellates 0-160m          | Dinoflagellates, depth-integrated abundance.                                                                                                                                                               | Traditional taxonomy, Inverted microscopy-visual examination | Inverted microscopy counting          |
| Diatoms 0-160m (0.002-0.4)              | Diatoms 0-160m                  | Diatoms, depth-integrated abundance.                                                                                                                                                                       | Traditional taxonomy, Inverted microscopy-visual examination | Inverted microscopy counting          |
| Meso-zooplankton 0-200m (0.3-5)         | Meso-zooplankton 0-200          | Annelida, Echinodermata, Ctenophora, Tunicata, Nemertea, Cnidaria and others                                                                                                                               | 18SrRNA                                                      | Not determined                        |
| Meso-zooplankton surface (0.3-5)        | Meso-zooplankton surface        | Annelida, Echinodermata, Ctenophora, Cnidaria, Mollusca, Chordata, Arthropoda                                                                                                                              | Morphological characters, visual examination                 | Traditional taxonomy                  |
| Gelatinous zooplankton (>5)             | Gelatinous zooplankton          | Salpidae, Cnidaria, Ctenophora                                                                                                                                                                             | Morphological characters and high-resolution photography     | Traditional taxonomy                  |
| Macro-zooplankton (4-15)                | Macro-zooplankton               | Nudibranchia, macrocrustaceans (phyllosoma and megalopa decapoda larvae) and Halobates insects                                                                                                             | 16SrRNA and Cox1 gene                                        | Estereo-microscope counting           |
| Myctophids (20-110)                     | Myctophids                      | Myctophid fishes                                                                                                                                                                                           | Morphological and morphometric characters                    | Traditional taxonomy                  |

**Supplementary Table 4. Description of the biological dataset.** The biological groups members with the number of species and OTU (Operational Taxonomic Unit) and its habitat. E = Epipelagic, N = Neustonic, M = Mesopelagic.

| Main biological groups                     | Number of species / OTU | Number of stations | Habitat |
|--------------------------------------------|-------------------------|--------------------|---------|
| Prokaryotes                                | 1218                    | 120                | E       |
| Microbial eukaryotes all                   | 35615                   | 112                | E       |
| Coccolithophores 0-160m                    | 47                      | 133                | E       |
| Diatoms 0-160m                             | 68                      | 133                | E       |
| Dinoflagellates 0-160m                     | 236                     | 133                | E       |
| Meso-zooplankton 0-200m                    | 4283                    | 36                 | E       |
| Gelatinous zooplankton                     | 12                      | 61                 | N       |
| Macro-zooplankton                          | 46                      | 65                 | N       |
| Myctophids                                 | 12                      | 95                 | M&N     |
| Microbial eukaryotes biological sub-groups | Number of species / OTU | Number of stations | Habitat |
| Small heterotrophic flagellates            | 1014                    | 112                | E       |
| Green algae                                | 451                     | 112                | E       |
| Fungi                                      | 59                      | 89                 | E       |
| Parasites                                  | 20466                   | 112                | E       |
| Cercozoa                                   | 84                      | 107                | E       |
| Large flagellates                          | 375                     | 112                | E       |
| Dinoflagellates surface                    | 8391                    | 112                | E       |
| Diatoms surface                            | 85                      | 93                 | E       |
